# Supplementary material
Source: HighWire-hosted journal article supplement (http://canjsurg.ca/highwire/filestream/98368/field_highwire_adjunct_files/0/CJS-019721-at-1.pdf)
Supplement: CJS-019721-at-1.pdf [file CJS-019721-at-1.pdf]

DOI: 10.1503/cjs.019721

Online appendices are unedited and posted as supplied by the authors.

## Appendix 1: Search Strategies

### OID MEDLINE 10 June 2021

|                                                                                                                                                                                                                                                                                                                                                                                                                                                                                                                                                                                                                                                                                                                                                                                       |        |
|---------------------------------------------------------------------------------------------------------------------------------------------------------------------------------------------------------------------------------------------------------------------------------------------------------------------------------------------------------------------------------------------------------------------------------------------------------------------------------------------------------------------------------------------------------------------------------------------------------------------------------------------------------------------------------------------------------------------------------------------------------------------------------------|--------|
| exp proctectomy/ or exp colectomy/ or colorectal surgery/                                                                                                                                                                                                                                                                                                                                                                                                                                                                                                                                                                                                                                                                                                                             | 25715  |
| (exp colon/ or rectum/) and exp surgical procedures, operative/                                                                                                                                                                                                                                                                                                                                                                                                                                                                                                                                                                                                                                                                                                                       | 33840  |
| rectal diseases/su or exp colorectal neoplasms/su or exp proctitis/su or exp colonic diseases/su or exp colon/su or rectum/su                                                                                                                                                                                                                                                                                                                                                                                                                                                                                                                                                                                                                                                         | 75065  |
| (proctectom* or colectom* or hemicolectom* or proctocolectom* or sigmoidectom* or "ap resection" or aper or miles operation or tme).ti,ab,kf                                                                                                                                                                                                                                                                                                                                                                                                                                                                                                                                                                                                                                          | 27139  |
| ((resection* or excision* or extirpation* or surger* or surgical* or operative* or operation*) adj3 (rectum or rectal* or abdominoperinea* or abdomino-perinea* or colon* or colorectal* or anterior or mesorectal*)) .ti,ab,kf                                                                                                                                                                                                                                                                                                                                                                                                                                                                                                                                                       | 55612  |
| or/1-5                                                                                                                                                                                                                                                                                                                                                                                                                                                                                                                                                                                                                                                                                                                                                                                | 137317 |
| exp fluoroquinolones/ or exp premedication/ or surgical wound infection/pc or exp anti-bacterial agents/ or anti-infective agents/                                                                                                                                                                                                                                                                                                                                                                                                                                                                                                                                                                                                                                                    | 806115 |
| ((antibacterial* or anti-bacterial* or antibiotic* or anti-biotic* or antimicrob* or anti-microb* or antiinfect* or anti-infect*) and (prophyla* or preoperati* or pre-operati* or presurg* or pre-surg* or premedicat* or pre-medicat* or prevent*)).mp.                                                                                                                                                                                                                                                                                                                                                                                                                                                                                                                             | 124051 |
| (fluoroquinolone* or cipro* or acire or bacquinor or bactiflox or baflox or bernoflox or "c-floxacin" or cetraflux or cetraxal or ciclodin or cidroxal or cifo or ciproxin or ciloquin or ciloxin or cimogal or cinaflox or cipflox or cipide or cipocin or ciprinol or cirok* or cirox* or citopcin or corsacin or cyfloxin or eprocin or estecina or fimoflox or fleroxacin or flociprin or floroxin or floxantina or grifociprox or holdestin or ibixacin or inciflox or iprolan or kipocin or lofucin or medociprin or mitroken or neofloxin or nivoflox or oftacilox or proflaxin or profloxin or proksi or proquin or proxacin or qilaflox or qinosyn or qu inodis or rigoran or septocipro or siprogut or spitacin or superocin or unicexal or uroxin or zipra or zumaflox).mp | 49293  |
| (floxacin or megalocin or megalone or norfloxacin or cadazolid or cadrofloxacine or cetefloxacin or clinafloxacin).mp                                                                                                                                                                                                                                                                                                                                                                                                                                                                                                                                                                                                                                                                 | 950    |
| (enoxacin or bactid?n or comprecin or enoram or enoxabid or enox?n or gyramid or penetrex).mp                                                                                                                                                                                                                                                                                                                                                                                                                                                                                                                                                                                                                                                                                         | 1166   |
| (delafloxacin or baxdela or quofenix).mp                                                                                                                                                                                                                                                                                                                                                                                                                                                                                                                                                                                                                                                                                                                                              | 160    |
| (acorafloxacin or avorafloxacin or alatrofloxacine or alatrovafloxacin or amifloxacin or antofloxacin).mp                                                                                                                                                                                                                                                                                                                                                                                                                                                                                                                                                                                                                                                                             | 152    |
| (levonadifloxacin or alalevonadifloxacin).mp                                                                                                                                                                                                                                                                                                                                                                                                                                                                                                                                                                                                                                                                                                                                          | 21     |
| (balofloxacin or neuroquinoron or binfloxacin or qroxin or "q-roxin" or ecenofloxacin).mp                                                                                                                                                                                                                                                                                                                                                                                                                                                                                                                                                                                                                                                                                             | 52     |
| (enrofloxacin or baytril or hipralona or irloxacin or pifloxacin or lascufloxacin or marbofloxacine or merafloxacin).mp                                                                                                                                                                                                                                                                                                                                                                                                                                                                                                                                                                                                                                                               | 3189   |
| (flumequin* or apurone or flumiquil or flumural).mp                                                                                                                                                                                                                                                                                                                                                                                                                                                                                                                                                                                                                                                                                                                                   | 505    |
| (gatifloxacin or gemifloxacin or grepafloxacin or vaxar or factive or bonoq or gaticin or gatiflo or starox or tequin or zymar or zumaxid or zyquin).mp                                                                                                                                                                                                                                                                                                                                                                                                                                                                                                                                                                                                                               | 2451   |
| (levofloxacin or aeroquin or cravit or elequine or floxacin or leroxacin or lesacin or levaquin or levokacin or levoxacin or mosardal or nofaxin or oftaquix or prixar or quinsair or quixin or reskuin or tavanic or volequin).mp                                                                                                                                                                                                                                                                                                                                                                                                                                                                                                                                                    | 8659   |
| (lomefloxacin or bareon or decalogiflox or lofloquin or logiflox or lomaday or lomaxacin or lomebact or lomeflo* or mahaquin or maxaquin or okacin or omniquin or uniquin).mp                                                                                                                                                                                                                                                                                                                                                                                                                                                                                                                                                                                                         | 944    |
| (moxifloxacin or actira or avalox or avelon or avelox or bacterol or floxamic or floxitrat or izilox or kanavig or lifodrox or megaxin or moksacrine or monafox or moxeza or moxivig or octegra or proflox or tamvelier or vamocin or vigamox or xiflodrop).mp                                                                                                                                                                                                                                                                                                                                                                                                                                                                                                                        | 5387   |

DOI: 10.1503/cjs.019721

Online appendices are unedited and posted as supplied by the authors.

|                                                                                                                                                                                                                                                                                                                                                                                                                                                                                                                                                                                                                                                   |         |
|---------------------------------------------------------------------------------------------------------------------------------------------------------------------------------------------------------------------------------------------------------------------------------------------------------------------------------------------------------------------------------------------------------------------------------------------------------------------------------------------------------------------------------------------------------------------------------------------------------------------------------------------------|---------|
| (nadifloxacin or acuatim or aquatim or nadixa or nordifloxacin or sarafloxacin or olamufloxacin or orbifloxacin or orbax or pazufloxacin or pasil or pazucross).mp                                                                                                                                                                                                                                                                                                                                                                                                                                                                                | 625     |
| (norfloxacin or ambigram or amicrobin or anquin or apirol or baccidal or barazan or bexinor or chibrox* or effectsal or esclebin or euroflox or fluseminal or foxinon or gonorcin or gyrablock or hurusfec or insensye or janacin or lexinor or manoflox or myfloxin or negaflox or nolicin or noracin or norflohexal or norflox* or noritacin or norocin or noroxin* or norpefloxacin or norpurisine or norxacin or nufloxib or oranor or orsan?c or proxinor or respexil or sebercim or septinor or snoffocin or sofasin or tenusin or trizolin or urekacin or uritracin or urobacid or uroxacin or winaflox or utiflox or zoroxin or xacin).mp | 5401    |
| (oflox* or akilen or audret or bactocin or danoflox or effexin or eukinoft or exocin? or flobacin or flodemex or flotavid or flovid or floxal or floxedol or floxigen or floxi? or floxstat or fugacin or gyroflox or inoflox or kinflocin or kinoxacin or loxinter or marfloxacin or me dofloxin? or mergexin or monoflocet or novecin or nufaflogo or oflocin or oflod* or onexacin or operan or orocin or oxatrex or praxin or quotavil or romacin or sinflo or surnox or tabrin or tar?vid or tar?flox or telbit or trafloxal or urotarivid or viotisone or zanocin).mp                                                                       | 10059   |
| (pefloxacin or abaktal or peflacin? or peflox or perfloxacin or ulifloxacin or prulifloxacin or chinoplus or keraflox or oliflox or prixina or quisnon or unidrox or rufloxacin or sitafloxacin or gracevit).mp                                                                                                                                                                                                                                                                                                                                                                                                                                   | 2083    |
| (sparfloxacin or newspar or resflox or spardac or sparlox or torospar or wanflox or zagam or temafloxacin? or omniflox or teflox or temac or tosufloxacin or tosuxacin).mp                                                                                                                                                                                                                                                                                                                                                                                                                                                                        | 1726    |
| (trov?floxacin or trovan or vebufloxacin or zabofloxacin).mp                                                                                                                                                                                                                                                                                                                                                                                                                                                                                                                                                                                      | 827     |
| or/7-27                                                                                                                                                                                                                                                                                                                                                                                                                                                                                                                                                                                                                                           | 869549  |
| 6 and 28                                                                                                                                                                                                                                                                                                                                                                                                                                                                                                                                                                                                                                          | 4480    |
| randomized controlled trial.pt                                                                                                                                                                                                                                                                                                                                                                                                                                                                                                                                                                                                                    | 533070  |
| controlled clinical trial.pt                                                                                                                                                                                                                                                                                                                                                                                                                                                                                                                                                                                                                      | 94201   |
| clinical trials as topic.sh                                                                                                                                                                                                                                                                                                                                                                                                                                                                                                                                                                                                                       | 196221  |
| (randomized or randomised or randomly or placebo*).ab                                                                                                                                                                                                                                                                                                                                                                                                                                                                                                                                                                                             | 1008082 |
| trial.ti                                                                                                                                                                                                                                                                                                                                                                                                                                                                                                                                                                                                                                          | 241489  |
| or/30-34                                                                                                                                                                                                                                                                                                                                                                                                                                                                                                                                                                                                                                          | 1412257 |
| 29 and 35                                                                                                                                                                                                                                                                                                                                                                                                                                                                                                                                                                                                                                         | 972     |
| exp animals/ not humans.sh                                                                                                                                                                                                                                                                                                                                                                                                                                                                                                                                                                                                                        | 4839817 |
| (exp child/ or exp infant/ or adolescent/) not exp adult/                                                                                                                                                                                                                                                                                                                                                                                                                                                                                                                                                                                         | 1941784 |
| (comment or editorial or interview or news or newspaper article).pt                                                                                                                                                                                                                                                                                                                                                                                                                                                                                                                                                                               | 1540842 |
| or/37-39                                                                                                                                                                                                                                                                                                                                                                                                                                                                                                                                                                                                                                          | 8183136 |
| 36 not 40                                                                                                                                                                                                                                                                                                                                                                                                                                                                                                                                                                                                                                         | 933     |
| limit 41 to english language                                                                                                                                                                                                                                                                                                                                                                                                                                                                                                                                                                                                                      | 822     |

## OVID EMBASE 10 Jun 2021

|                                                                                                                                                                        |        |
|------------------------------------------------------------------------------------------------------------------------------------------------------------------------|--------|
| exp colon surgery/ or exp colorectal surgery/ or exp rectum surgery/                                                                                                   | 103199 |
| (exp colon/ or exp rectum/) and exp surgery/                                                                                                                           | 39613  |
| colorectal disease/su or rectum disease/su or proctocolitis/su or exp colorectal tumor/su or exp proctitis/su or exp colon disease/su or exp colon/su or exp rectum/su | 69252  |
| (proctectom* or colectom* or hemicolectom* or proctocolectom* or sigmoidectom* or "ap resection" or aper or miles operation or tme).ti,ab,kw                           | 45166  |

DOI: 10.1503/cjs.019721

Online appendices are unedited and posted as supplied by the authors.

|                                                                                                                                                                                                                                                                                                                                                                                                                                                                                                                                                                                                                                                                                                                                                                                       |        |
|---------------------------------------------------------------------------------------------------------------------------------------------------------------------------------------------------------------------------------------------------------------------------------------------------------------------------------------------------------------------------------------------------------------------------------------------------------------------------------------------------------------------------------------------------------------------------------------------------------------------------------------------------------------------------------------------------------------------------------------------------------------------------------------|--------|
| ((resection* or excision* or extirpation* or surger* or surgical* or operative* or operation*) adj3 (rectum or rectal* or abdominoperinea* or abdomino-perinea* or colon* or colorectal* or anterior or mesorectal*)).ti,ab,kw                                                                                                                                                                                                                                                                                                                                                                                                                                                                                                                                                        | 83449  |
| or/1-5                                                                                                                                                                                                                                                                                                                                                                                                                                                                                                                                                                                                                                                                                                                                                                                | 212774 |
| quinolone derivative/ or premedication/ or surgical infection/ pc or antiinfective agent/ or antibiotic agent/                                                                                                                                                                                                                                                                                                                                                                                                                                                                                                                                                                                                                                                                        | 530185 |
| ((antibacterial* or anti-bacterial* or antibiotic* or anti-biotic* or antimicrob* or anti-microb* or antiinfect* or anti-infect*) and (prophyla* or preoperati* or pre-operati* or presurg* or pre-surg* or premedicat* or pre-medicat* or prevent*).mp.                                                                                                                                                                                                                                                                                                                                                                                                                                                                                                                              | 199763 |
| (fluoroquinolone* or cipro* or acire or bacquinor or bactiflox or baflox or bernoflox or "c-floxacin" or cetraflux or cetralax or ciclodin or cidroxal or ciflo or ciproxin or ciloquin or ciloxin or cimogal or cinaflox or cipflox or cipide or cipocin or ciprinol or cirok* or cirox* or citopcin or corsacin or cyfloxin or eprocin or estecina or fimoflox or fleroxacin or flociprin or floroxin or floxantina or grifociprox or holdestin or ibixacin or inciflox or iprolan or kipocin or lofucin or medociprin or mitroken or neofloxin or nivoflox or oftacilox or proflaxin or profloxin or proksi or proquin or proxacin or qilaflox or qinosyn or quinodis or rigoran or septocipro or siprogut or spitacin or superocin or unicexal or uroxin or zipra or zumaflox).mp | 125111 |
| (fleroxacin or megalocin or megalone or norfleroxacin or cadazolid or cadrofloxacine or cetefloxacin or clinafloxacin).mp                                                                                                                                                                                                                                                                                                                                                                                                                                                                                                                                                                                                                                                             | 2737   |
| (enoxacin or bactid?n or comprecin or enoram or enoxabid or enox?n or gyramid or penetrex).mp                                                                                                                                                                                                                                                                                                                                                                                                                                                                                                                                                                                                                                                                                         | 3532   |
| (delafloxacin or baxdela or quofenix).mp                                                                                                                                                                                                                                                                                                                                                                                                                                                                                                                                                                                                                                                                                                                                              | 353    |
| (acorafloxacin or avorafloxacin or alatrofloxacine or alatrovafloxacin or amifloxacin or antofloxacin).mp                                                                                                                                                                                                                                                                                                                                                                                                                                                                                                                                                                                                                                                                             | 461    |
| (levonadifloxacin or alalevonadifloxacin).mp                                                                                                                                                                                                                                                                                                                                                                                                                                                                                                                                                                                                                                                                                                                                          | 29     |
| (balofloxacin or neuroquinoron or binfloxacin or qroxin or "q-roxin" or ecenofloxacin).mp                                                                                                                                                                                                                                                                                                                                                                                                                                                                                                                                                                                                                                                                                             | 305    |
| (enrofloxacin or baytril or hipralona or irloxacin or pifloxacin or lascufloxacin or marbofloxacine or merafloxacine).mp                                                                                                                                                                                                                                                                                                                                                                                                                                                                                                                                                                                                                                                              | 7719   |
| (flumequin* or apurone or flumiquil or flumural).mp                                                                                                                                                                                                                                                                                                                                                                                                                                                                                                                                                                                                                                                                                                                                   | 1267   |
| (gatifloxacin or gemifloxacin or grepafloxacin or vaxar or factive or bonoq or gaticin or gatiflo or starox or tequin or zymar or zumaxid or zyquin).mp                                                                                                                                                                                                                                                                                                                                                                                                                                                                                                                                                                                                                               | 8911   |
| (levofloxacin or aeroquin or cravit or elequine or floxacine or leroxacin or lesacin or levaquin or levokacin or levoxacin or mosardal or nofaxin or oftaquix or prixar or quinsair or quixin or reskuin or tavanic or volequin).mp                                                                                                                                                                                                                                                                                                                                                                                                                                                                                                                                                   | 40899  |
| (lomefloxacin or bareon or decalogiflox or lofloquin or logiflox or lomaday or lomaxacin or lomebact or lomeflo* or mahaquin or maxaquin or okacin or omniquin or uniquin).mp                                                                                                                                                                                                                                                                                                                                                                                                                                                                                                                                                                                                         | 3091   |
| (moxifloxacin or actira or avalox or avelon or avelox or bacterol or floxamic or floxitrat or izilox or kanavig or lifodrox or megaxin or moksacrine or monafox or moxeza or moxivid or octegra or proflox or tamvelier or vamocin or vigamox or xiflodrop).mp                                                                                                                                                                                                                                                                                                                                                                                                                                                                                                                        | 20658  |
| (nadifloxacin or acuatim or aquatim or nadixa or nordifloxacin or sarafloxacin or olamufloxacin or orbifloxacin or orbax or pazufloxacin or pasil or pazucross).mp                                                                                                                                                                                                                                                                                                                                                                                                                                                                                                                                                                                                                    | 1719   |
| (norfloxacin or ambigram or amicrobin or anquin or apirol or baccidal or barazan or bexinor or chibrox* or effectsal or eslebin or euroflox or fluseminal or foxinon or gonorcine or gyrablock or hurusfec or insensye or janacin or lexinor or manoflox or myfloxin or negaflox or nolacin or noracin or norflohexal or norflox* or noritacin or norocin or noroxin* or norpefloxacine or norpurisine or norxacin or nufloxib or oranor or orsan?c or proxinor or respexil or sebercim or septinor or snoffocin or sofasin or tenusin or trizolin or urekacin or uritracin or urobacid or uroxacin or winaflox or utiflox or zoroxin or xacin).mp                                                                                                                                    | 17924  |
| (oflox* or akilen or audret or bactocin or danoflox or effexin or eukinoft or exocin? or flobacin or flodemex or flotavid or flovid or floxal or floxedol or floxigen or floxi? or floxstat or fugacin or gyroflox or                                                                                                                                                                                                                                                                                                                                                                                                                                                                                                                                                                 | 28309  |

DOI: 10.1503/cjs.019721

Online appendices are unedited and posted as supplied by the authors.

|                                                                                                                                                                                                                                                                                                                                                      |         |
|------------------------------------------------------------------------------------------------------------------------------------------------------------------------------------------------------------------------------------------------------------------------------------------------------------------------------------------------------|---------|
| inoflox or kinflocin or kinoxacin or loxinter or marfloxacin or medofloxin? or mergexin or monoflocet or novecin or nufaflogo or oflocin or oflod* or onexacin or operan or orocin or oxatrex or praxin or quotavil or romacin or sinflo or surnox or tabrin or tar?vid or tar?flox or telbit or trafloxal or urotarivid or viotisone or zanocin).mp |         |
| (pefloxacin or abaktal or peflacin? or peflox or perfloxacin or ulifloxacin or prulifloxacin or chinoplus or keraflox or oliflox or prixina or quison or unidrox or rufloxacin or sitafloxacin or gracevit).mp                                                                                                                                       | 6565    |
| (sparfloxacin or newspar or resflox or spardac or sparlox or torospar or wanflox or zagam or temafloxacin? or omniflox or teflox or temac or tosufloxacin or tosuxacin).mp                                                                                                                                                                           | 5875    |
| (trov?floxacin or trovan or vebufloxacin or zabofloxacin).mp                                                                                                                                                                                                                                                                                         | 2522    |
| or/7-27                                                                                                                                                                                                                                                                                                                                              | 743275  |
| 6 and 28                                                                                                                                                                                                                                                                                                                                             | 11224   |
| randomized controlled trial/                                                                                                                                                                                                                                                                                                                         | 659197  |
| controlled clinical trial/                                                                                                                                                                                                                                                                                                                           | 463484  |
| exp "clinical trial (topic)"/                                                                                                                                                                                                                                                                                                                        | 357900  |
| (randomized or randomised or randomly or placebo*).ab                                                                                                                                                                                                                                                                                                | 1417056 |
| trial.ti                                                                                                                                                                                                                                                                                                                                             | 330177  |
| or/30-34                                                                                                                                                                                                                                                                                                                                             | 2019739 |
| 29 and 35                                                                                                                                                                                                                                                                                                                                            | 1372    |
| (exp animal/ or nonhuman/) NOT exp human/                                                                                                                                                                                                                                                                                                            | 6588574 |
| (exp child/ or exp adolescent/) not exp adult/                                                                                                                                                                                                                                                                                                       | 2233354 |
| editorial.pt                                                                                                                                                                                                                                                                                                                                         | 692502  |
| or/37-39                                                                                                                                                                                                                                                                                                                                             | 9346309 |
| 36 not 40                                                                                                                                                                                                                                                                                                                                            | 1304    |
| limit 41 to english language                                                                                                                                                                                                                                                                                                                         | 1207    |

## Cochrane Central (Ovid) 10 June 2021

|                                                                                                                                                                                                                                                           |       |
|-----------------------------------------------------------------------------------------------------------------------------------------------------------------------------------------------------------------------------------------------------------|-------|
| exp colectomy/ or colorectal surgery/                                                                                                                                                                                                                     | 937   |
| (exp colon/ or rectum/) and exp surgical procedures, operative/                                                                                                                                                                                           | 1095  |
| rectal diseases/su or exp colorectal neoplasms/su or exp proctitis/su or exp colonic diseases/su or exp colon/su or rectum/su                                                                                                                             | 107   |
| (proctectom* or colectom* or hemicolectom* or proctocolectom* or sigmoidectom* or "ap resection" or aper or miles operation or tme).ti,ab,kw                                                                                                              | 2281  |
| ((resection* or excision* or extirpation* or surger* or surgical* or operative* or operation*) adj3 (rectum or rectal* or abdominoperinea* or abdomino-perinea* or colon* or colorectal* or anterior or mesorectal*)).ti,ab,kw                            | 10898 |
| or/1-5                                                                                                                                                                                                                                                    | 12551 |
| exp fluoroquinolones/ or exp premedication/ or surgical wound infection/pc or exp anti-bacterial agents/ or anti-infective agents/                                                                                                                        | 32810 |
| ((antibacterial* or anti-bacterial* or antibiotic* or anti-biotic* or antimicrob* or anti-microb* or antiinfect* or anti-infect*) and (prophyla* or preoperati* or pre-operati* or presurg* or pre-surg* or premedicat* or pre-medicat* or prevent*)).mp. | 14651 |
| (fluoroquinolone* or cipro* or acire or bacquinor or bactiflox or baflox or bernoflo x or "c-floxacin" or cetraflux or cetralax or ciclodin or cidroxal or ciflo or ciproxin or ciloquin or ciloxin or cimogal or cinaflox                                | 4822  |

DOI: 10.1503/cjs.019721

Online appendices are unedited and posted as supplied by the authors.

|                                                                                                                                                                                                                                                                                                                                                                                                                                                                                                                                                                                                                                                   |       |
|---------------------------------------------------------------------------------------------------------------------------------------------------------------------------------------------------------------------------------------------------------------------------------------------------------------------------------------------------------------------------------------------------------------------------------------------------------------------------------------------------------------------------------------------------------------------------------------------------------------------------------------------------|-------|
| or cipflox or cipide or cipocin or ciprinol or cirok* or cirox* or citopcin or corsacin or cyfloxin or eprocin or estecina or fimoflox or fleroxacin or flociprin or floroxin or floxantina or grifociprox or holdestin or ibixacin or inciflox or iprolan or kipocin or lofucin or medociprin or mitroken or neofloxin or nivoflox or oftacilox or proflaxin or profloxin or proksi or proquin or proxacin or qilaflox or qinosyn or quinodis or rigoran or septocipro or siprogut or spitacin or superocin or unicexal or uroxin or zipra or zumaflox).mp                                                                                       | 147   |
| (fleroxacin or megalocin or megalone or norfleroxacin or cadazolid or cadrofloxacin or cetefloxacin or clinafloxacin).mp                                                                                                                                                                                                                                                                                                                                                                                                                                                                                                                          | 147   |
| (enoxacin or bactid?n or comprecin or enoram or enoxabid or enox?n or gyramid or penetrex).mp                                                                                                                                                                                                                                                                                                                                                                                                                                                                                                                                                     | 117   |
| (delafloxacin or baxdela or quofenix).mp                                                                                                                                                                                                                                                                                                                                                                                                                                                                                                                                                                                                          | 56    |
| (acorafloxacin or avorafloxacin or alatrofloxacin or alatrovafloxacin or amifloxacin or antofloxacin).mp                                                                                                                                                                                                                                                                                                                                                                                                                                                                                                                                          | 30    |
| (levonadifloxacin or alalevonadifloxacin).mp                                                                                                                                                                                                                                                                                                                                                                                                                                                                                                                                                                                                      | 6     |
| (balofloxacin or neuroquinoron or binfloxacin or qroxin or "q-roxin" or ecenofloxacin).mp                                                                                                                                                                                                                                                                                                                                                                                                                                                                                                                                                         | 11    |
| (enrofloxacin or baytril or hipralona or irloxacin or pifloxacin or lascufloxacin or marbofloxacin or merafloxacin).mp                                                                                                                                                                                                                                                                                                                                                                                                                                                                                                                            | 25    |
| (flumequin* or apurone or flumiquil or flumural).mp                                                                                                                                                                                                                                                                                                                                                                                                                                                                                                                                                                                               | 4     |
| (gatifloxacin or gemifloxacin or grepafloxacin or vaxar or factive or bonoq or gaticin or gatiflo or starox or tequin or zymar or zumaxid or zyquin).mp                                                                                                                                                                                                                                                                                                                                                                                                                                                                                           | 446   |
| (levofloxacin or aeroquin or cravit or elequine or floxacin or leroxacin or lesacin or levaquin or levokacin or levoxacin or mosardal or nofaxin or oftaquix or prixar or quinsair or quixin or reskuin or tavanic or volequin).mp                                                                                                                                                                                                                                                                                                                                                                                                                | 1778  |
| (lomefloxacin or bareon or decalogiflox or lofloquin or logiflox or lomaday or lomaxacin or lomebact or lomeflo* or mahaquin or maxaquin or okacin or omniquin or uniquin).mp                                                                                                                                                                                                                                                                                                                                                                                                                                                                     | 164   |
| (moxifloxacin or actira or avalox or avelon or avelox or bacterol or floxamic or floxitrat or izilox or kanavig or lifodrox or megaxin or moksacrin or monafox or moxeza or moxivid or octegra or proflox or tamvelier or vamocin or vigamox or xiflodrop).mp                                                                                                                                                                                                                                                                                                                                                                                     | 1800  |
| (nadifloxacin or acuatim or aquatim or nadixa or nordifloxacin or sarafloxacin or olamufloxacin or orbifloxacin or orbax or pazufloxacin or pasil or pazucross).mp                                                                                                                                                                                                                                                                                                                                                                                                                                                                                | 73    |
| (norfloxacin or ambigram or amicrobin or anquin or apirol or baccidal or barazan or bexinor or chibrox* or effectsal or esclebin or euroflox or fluseminal or foxinon or gonorcin or gyrablock or hurusfec or insensye or janacin or lexinor or manoflox or myfloxin or negaflox or nolycin or noracin or norflohexal or norflox* or noritacin or norocin or noroxin* or norpefloxacin or norpurisine or norxacin or nufloxib or oranor or orsan?c or proxinor or respexil or sebercim or septinor or snoffocin or sofasin or tenusin or trizolin or urekacin or uritracin or urobacid or uroxacin or winaflox or utiflox or zoroxin or xacin).mp | 555   |
| (oflox* or akilen or audret or bactocin or danoflox or effexin or eukinoft or exocin? or flobacin or flodemex or flotavid or flovid or floxal or floxedol or floxigen or floxi? or floxstat or fugacin or gyroflox or inoflox or kinflocin or kinoxacin or loxinter or marfloxacin or medofloxin? or mergexin or monoflocet or novecin or nufaflogo or oflocin or oflod* or onexacin or operan or orocin or oxatrex or praxin or quotavil or romacin or sinflo or surnox or tabrin or tar?vid or tar?flox or telbit or trafloxal or urotarivid or viotisone or zanocin).mp                                                                        | 1570  |
| (pefloxacin or abaktal or peflacin? or peflox or perfloxacin or ulifloxacin or prulifloxacin or chinoplus or keraflox or oliflox or prixina or quisnon or unidrox or rufloxacin or sitafloxacin or gracevit).mp                                                                                                                                                                                                                                                                                                                                                                                                                                   | 333   |
| (sparfloxacin or newspar or resflox or spardac or sparlox or torospar or wanflox or zagam or temafloxacin? or omniflox or teflox or temac or tosufloxacin or tosuxacin).mp                                                                                                                                                                                                                                                                                                                                                                                                                                                                        | 206   |
| (trov?floxacin or trovan or vebufloxacin or zabofloxacin).mp                                                                                                                                                                                                                                                                                                                                                                                                                                                                                                                                                                                      | 99    |
| or/7-27                                                                                                                                                                                                                                                                                                                                                                                                                                                                                                                                                                                                                                           | 46541 |
| 6 and 28                                                                                                                                                                                                                                                                                                                                                                                                                                                                                                                                                                                                                                          | 913   |

Appendix 1 to Johnson G, Ziegler J, Helewa R, et al. Impact of the acute care surgery model on resident operative experience in emergency general surgery. *Can J Surg* 2023. Copyright © 2023 The Author(s) or their employer(s). To receive this resource in an accessible format, please contact us at [cmajgroup@cmaj.ca](mailto:cmajgroup@cmaj.ca).

DOI: 10.1503/cjs.019721

*Online appendices are unedited and posted as supplied by the authors.*

|                                                           |       |
|-----------------------------------------------------------|-------|
| (exp child/ or exp infant/ or adolescent/) not exp adult/ | 59488 |
| 29 not 30                                                 | 907   |
| limit 31 to english language                              | 606   |

## **Clinicaltrials.gov**

|                                 |    |
|---------------------------------|----|
| Antibiotic   colorectal surgery | 62 |
|---------------------------------|----|
